# Face dissimilarity judgements are predicted by representational distance in deep neural networks and principal-component face space

Kamila M. Jozwik<sup>\*1,✉</sup>, Jonathan O’Keeffe<sup>\*2,✉</sup>, Katherine R. Storrs<sup>\*3,✉</sup>, and Nikolaus Kriegeskorte<sup>4,✉</sup>

<sup>1</sup>Department of Psychology, University of Cambridge, Cambridge, UK.

<sup>2</sup>Cognition and Brain Sciences Unit, University of Cambridge, Cambridge, UK.

<sup>3</sup>Department of Experimental Psychology, Justus Liebig University, Giessen, Germany.

<sup>4</sup>Departments of Psychology and Neuroscience, Zuckerman Mind Brain Behavior Institute, Columbia University, New York, USA.

1 **Despite the importance of face perception in human and computer vision, no quantitative model of perceived face dissimilarity exists.**  
2 **We designed an efficient behavioural task to collect dissimilarity and same/different identity judgements for 232 pairs of realistic faces**  
3 **that densely sampled geometric relationships in a face space derived from principal components of 3D shape and texture (Basel Face**  
4 **Model, BFM). In a comparison of 15 models, we found that representational distances in deep neural networks (DNNs) and Euclidean**  
5 **distances within BFM space predicted human judgements best. A face-trained DNN explained unique variance over simpler models**  
6 **and was statistically indistinguishable from the noise ceiling. Sigmoidal transformation of distances improved performance for all**  
7 **models. Identity judgements were better predicted by Euclidean than angular or radial distances in BFM space. DNNs provide**  
8 **the best available image-computable models of perceived face dissimilarity. The success of BFM space suggests that human face**  
9 **perception is attuned to the natural distribution of faces.**

10 **face perception | face similarity | face identification | Basel Face Model | deep neural networks**

11 **Correspondence: [jozwik.kamila@gmail.com](mailto:jozwik.kamila@gmail.com)**

12 Recognizing people by their faces is crucial to human social behaviour. Despite much work on the neural and behavioural  
13 signatures of face perception (see e.g. (1–4)), there is currently no quantitative model to predict how alike two faces will look  
14 to human observers. Advances in deep learning have yielded powerful artificial systems for face and object recognition (5–7),  
15 and 3D modelling and rendering techniques make it possible to systematically explore the space of possible faces (8–10). Here  
16 we investigate perceived dissimilarity among large sets of realistic faces and test a wide range of models.

17  
18 Since faces of different people are structurally highly similar and vary along continuous dimensions (nose length, jaw width,  
19 etc.), it is helpful to think of faces as forming a continuous "face space" (11–13). A face space is an abstract space in which  
20 each face occupies a unique position. The dimensions of the space represent the physiognomic features that vary between faces.  
21 The origin of the multidimensional space is defined as the average face: the central tendency of the population of all faces. For  
22 an individual, this reference point is thought to reflect the sample of faces encountered in natural experience (9). Each face can  
23 then be thought of as a vector of features.

24 We used the Basel Face Model (BFM) (8), a widely used model in both computer graphics and face perception research (e.g.  
25 (14, 15)). The BFM is a 3D generative graphics model that produces nearly photorealistic face images from latent vectors  
26 describing shape and texture of the surfaces of natural faces. The model is based on principal components analysis (PCA) of  
27 3D photo scans of 200 adult faces (8).

28 We asked to what extent the latent description of the BFM model and a range of image-computable models can predict the  
29 dissimilarity of two faces as perceived by humans. In addition, we asked to what extent the models can capture whether two  
30 images will be judged by people as depicting the same person. A model predicting identity judgements would have to capture  
31 the fact that people are able to discount various variations in appearance of the same person’s face, such as the changes caused  
32 by ageing, weight fluctuations, and tanning.

33 Previous research has debated the relative contribution of shape vs textural information for face identification (16, 17). The  
34 BFM is defined in terms of two separate PCA spaces, one controlling the surface shape of the face via its 3D mesh, and the  
35 other controlling the texture and colouration of the face via its RGB texture map (Figure 1a). This enables us to ask whether  
36 human judgements are explained better by the coordinates within the shape or the texture subspaces in the BFM.

37  
38 The distance in the BFM face space is not the only way to predict the perceived dissimilarity between two faces. We compare  
39 a range of representational models that enable us to measure the distance between the representations of any two particular  
40 face images. The models include raw pixel intensities, GIST features, 3D-mesh vertex coordinates used to render the faces,  
41 as well as computer-vision models such as HMAX and deep convolutional neural networks (DNNs). DNNs now rival human  
42 performance at visual face identification. Face-identification-trained DNNs have been shown to predict neural activity well in  
43 face-selective human brain regions recorded intracranially (18). Do these networks also capture subtle perceptual dissimilarity

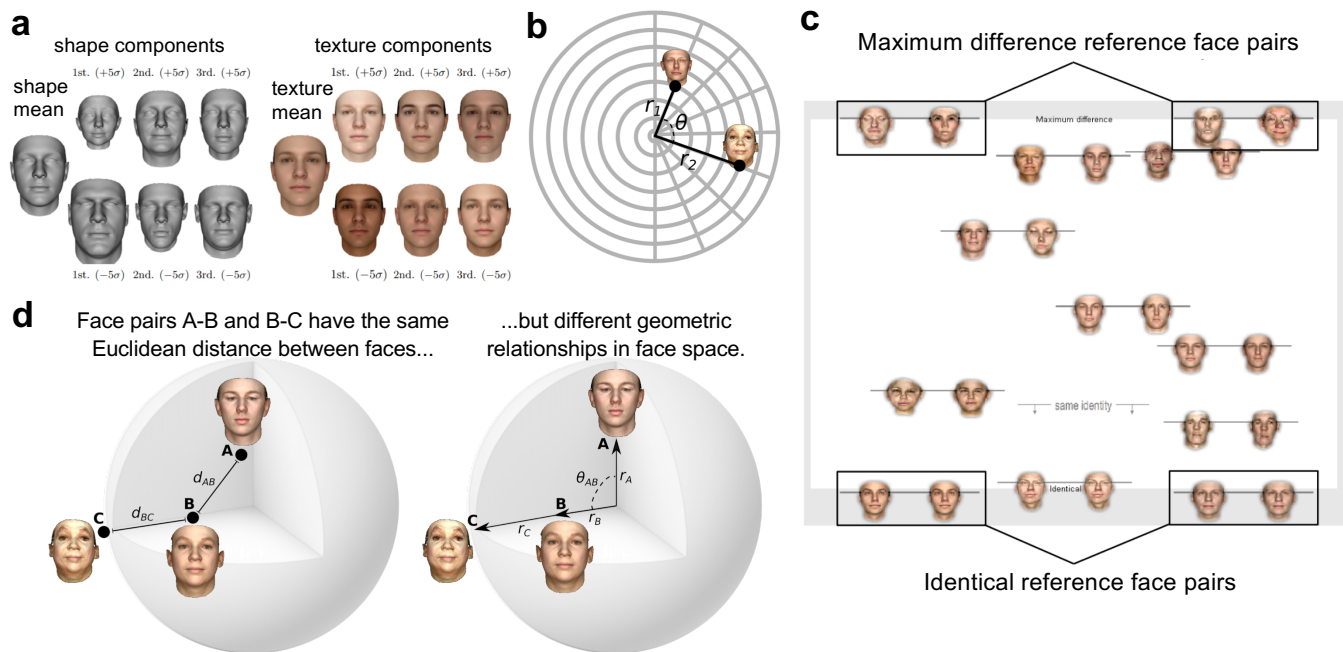

**Fig. 1.** Selecting pairs of faces from the BFM, and measuring perceived face dissimilarity and identity.

**a** Illustration of the generative Basel Face Model (BFM), in which faces are described by separate components specifying their 3D shape (left) and texture (right). Both shape and texture components have a mean shape or texture (leftmost column), that can be changed by manipulating principal components. The first three PCs within each subspace are shown here (right three columns). Reproduced with permission from (8).

**b** Stimulus selection. We defined stimuli as pairs of vectors in the BFM with radial lengths  $r_1$  and  $r_2$ , and angle between them ( $\theta$ ). We sampled all unique combinations from 8  $\theta$  values and 8 radius values to obtain 232 face pairs. See Methods for details.

**c** Behavioural experiment method. Participants positioned the face pairs along the vertical axis of the screen according to their relative dissimilarity. Faces were arranged in random subsets of eight pairs, as in the example shown. The vertical position of the line linking face pairs determined their precise location. As points of reference for participants, two example face pairs depicting "Maximum difference" (top) and two example face pairs depicting "Identical" (bottom) were shown. For each subset, participants also placed a "same identity" bar indicating the point below which pairs of images appear to depict the same identity.

**d** Relationships between pairs of faces in a face space like the BFM can be thought of in terms of the Euclidean distance between them (left), or their geometric relationships relative to the centre of the face space (right). If perceived dissimilarity can be predicted from the Euclidean distance alone, then face pair AB should look exactly as similar to one another as face pair BC. However, if observers take the angular and radial geometry of face space into account, they may have substantially different similarities.

44 relationships? Is the ranking of face pairs in these networks similar to that in human judgements? Does the visual diet of these  
45 networks affect their ability to capture human dissimilarity judgements?

46  
47 To gain more insight into how humans judge face dissimilarity and identity, we designed a novel task for efficiently obtaining  
48 high-fidelity dissimilarity and identity judgements. Previous studies used multi-arrangement task for individual images of  
49 objects (19) but not pairs of images. We selected stimulus pairs to systematically sample geometric relations in statistical face  
50 space, exhaustively creating all combinations from a large set of facial vector lengths and angles (Figure 1b and 2a), see Meth-  
51 ods). This experimental design allowed us to carefully test how well the BFM's statistical space captured human judgements,  
52 and what the geometric relationship was between distances in the BFM and distances in human perceptual space. During the  
53 task, participants arranged pairs of face images on a large touch-screen according to how similar they appeared, relative to  
54 anchoring face pairs at the top and bottom of the screen and relative to other adjusted pairs (Figure 1c). This task yielded  
55 a superior measure to standard dissimilarity ratings in three ways: 1) it produced a fine-grained continuous measure of face  
56 dissimilarity within each pair (the vertical position at which the pair was placed on the screen), 2) it was efficient (many pairs  
57 could be placed within a single trial) and 3) it was robust, since judgements are anchored relative to multiple visual references  
58 simultaneously (both the extreme anchor pairs provided above and below the sorting arena and the other adjustable pairs within  
59 each trial). Participants also placed a horizontal bar on each trial that indicated the separation between face pairs that appeared  
60 to depict different individuals, and pairs that appeared to depict different instances of "the same person". We sought to model  
61 both the continuous aspects of human face perception (graded dissimilarity) and its categorical aspects (same/different identity).  
62

## 63 Results

64 Participants (N=26) were highly reliable in their dissimilarity judgements using the novel arrangement task (mean correlation  
65 between participants = 0.80, mean correlation for the same participant between sessions = 0.85, stimulus set A experiment),  
66 providing a high-quality dataset with which to adjudicate between candidate models. We repeated the same experiment with  
67 a subset of the same participants (N=15) six months later, with a new independently sampled face set fulfilling the same  
68 geometric relations as the original stimulus set (stimulus set B experiment, see Methods). Participants in the stimulus set B  
69 experiment were also highly reliable in their dissimilarity judgements (mean correlation between participants = 0.79). This  
70 level of replicability allowed us to evaluate to what extent dissimilarity judgements depend on idiosyncrasies of individual  
71 faces, and to what extent they can be predicted from geometric relations within a statistical face space.

72 **Face dissimilarity judgements can be well predicted by distance in a statistical face space.** We first asked how  
73 well human face dissimilarity judgements could be predicted by distances within the Basel Face Model (BFM), the principal-  
74 components face space from which our stimuli had been generated. Since we had selected face pairs to exhaustively sample  
75 different geometric relationships within the BFM, defined in terms of the angle between faces and the radial distance of each  
76 face from the origin, we were able to visualise human dissimilarity ratings in terms of these geometric features (Figure 2b).  
77 The human ratings bore a strong resemblance to the patterns of the Euclidean distances among our stimuli (Figure 2a). Given  
78 this, we plotted dissimilarity judgements for each face pair as a function of the Euclidean distance in the BFM. To test how  
79 well the BFM approximates face dissimilarity judgements we tested functions that best described the relationship between the  
80 behavioural dissimilarity judgements and the BFM. We plotted the predictions of each fitted model over the data and compared  
81 the models. If the BFM is a perfect approximator of face dissimilarity judgements a linear function would best describe  
82 the relationship between face dissimilarity judgements and the Euclidean distances in the BFM (Figure 2c). We do not find  
83 this assumption to be completely true as the sigmoidal function better describes the relationship between face dissimilarity  
84 judgements and the Euclidean distances in the BFM (Figure 2c). The sigmoidal relationship between the BFM and perceived  
85 distances suggests that observers have maximal sensitivity to differences between faces occupying moderately distant points in  
86 the statistical face space, at the expense of failing to differentiate between different levels of dissimilarity among very nearby or  
87 very far apart faces. This latter result may be related to the fact that faces with very large Euclidean distances in the BFM look  
88 slightly caricatured to humans. We observed similar results in the stimulus set B experiment (face dissimilarity judgements  
89 using different face pairs with the same geometrical properties as in the stimulus set A experiment, see Methods for details,  
90 Figure 2c). This result suggests that the sigmoidal relationship between the BFM and perceived distances is observed regardless  
91 of face pairs sampled. Overall, the BFM is a good, but not perfect, approximator of face dissimilarity judgements.

92 **Face identity judgements can be well predicted from the Euclidean distance in BFM.** We also asked humans to judge  
93 whether each pair of faces depicted the same or different identity, and examined human identity thresholds in relation to the  
94 Euclidean distance between faces in the BFM. We found that moderately dissimilar faces are often still perceived as having the  
95 same identity (Figure 3a, Figure 4). We observed similar results in the stimulus set B experiment (Figure 3c, Figure 4). The  
96 examples of face pairs judged as the same identity are shown in Figure 4. This result may be related to humans having a high  
97 tolerance to changes in a personal appearance due to age, weight fluctuations, or skin complexion depending on the season.

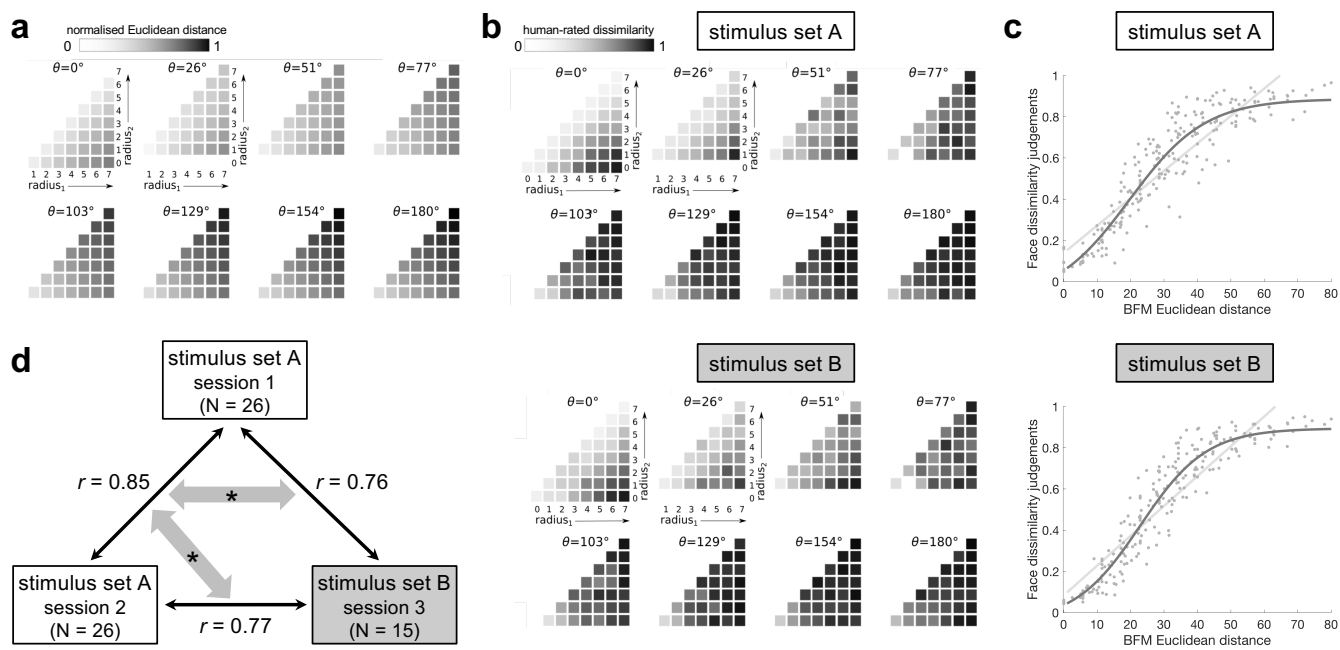

**Fig. 2.** Face dissimilarity judgements as a function of distances in the BFM.

**a)** Euclidean distances within the BFM for each face-pair in the stimulus sets. Sets A and B had identical BFM geometries, but used different specific face exemplars. Each grid shows pairs of face vectors separated by a specific angle ( $\theta$ ), and arranged by the lengths of each of the two vectors ( $radius_1$  and  $radius_2$ ). Radii were sampled in eight evenly-spaced steps, where step 0 = a length of zero, and step 7 = a length of 40 units in the BFM. Normalised Euclidean distance is indicated by darkness, from white (zero) to black (maximum distance within the stimulus set).

**b)** Human face dissimilarity judgements for each face pair, for stimulus set A (top) and B (bottom). Plotting conventions are as in 2a, except that darkness indicates human-rated dissimilarity, from white (identical faces) to black (maximally dissimilar faces), averaged over participants and trials.

**c)** Face dissimilarity judgements (y-axis) as a function of Euclidean distance in the BFM (x-axis) for stimulus set A (top) and B (bottom). Each dot represents the mean dissimilarity rating for one pair of faces, averaged across participants and trials. The pale grey line represents the fit of a linear function and the dark grey line represents the fit of a sigmoidal function to the data.

**d)** Replicability of face dissimilarity judgements between sessions 1 and 2 (using stimulus set A and the same participants), and session 3 (using stimulus set B and a subset of the participant group). Values are Pearson correlation coefficients, averaged across participants. Grey arrows with asterisks indicate significantly different correlations (two-sample t-test,  $p < 0.05$ ).

98 Face pairs in the BFM can be analyzed in terms of their geometric characteristics relative to the centre of the face space or  
 99 as the Euclidean distance between them. Therefore, we tested alternative predictors of face identity judgements: geometry  
 100 in the BFM ( $\theta$ , absolute difference between  $r_1$  and  $r_2$ ) and the Euclidean distance. We could predict whether two faces will  
 101 be classified as the same individual by each of the predictors, however, the Euclidean distance in the BFM predicted identity  
 102 judgements better than the angular and radial geometry of face space.

103 **Relative geometry within BFM is approximately but not exactly perceptually isotropic.** As face pairs used in the  
 104 stimulus set A and stimulus set B experiments had the same relative geometries but different face exemplars we could test  
 105 whether the relative geometry within BFM is perceptually isotropic. To address that, we tested face dissimilarity judgements  
 106 replicability by correlating average judgements across participants in stimulus sets A and B. Participants completed two sessions  
 107 of the stimulus set A experiment and a subset of participants (15 out of 26) completed the third session of the stimulus set B  
 108 experiment. If the relative geometry within BFM is isotropic then the correlation between stimulus set A and B experiments  
 109 should be the same as the correlation between two sessions of the stimulus set A experiment. The correlation between two  
 110 sessions of the stimulus set A experiment is 0.85, the correlation between stimulus set A session 1 and stimulus set B session 3  
 111 experiment is 0.76, and the correlation between stimulus set A session 2 and stimulus set B session 3 experiment is 0.77 (Figure  
 112 2d). These results suggest that the relative geometry within BFM is approximately, but not exactly, perceptually isotropic and  
 113 we do not have strong evidence against isotropy. The stimulus set B experiment was performed 6 months after the stimulus set  
 114 A experiment therefore the differences in correlations between session could be attributed to the longer time between sessions  
 115 with different face exemplars.

116 **Face dissimilarity judgements can be well predicted by a DNN trained on either faces or objects.** We measured  
 117 the dissimilarity of face representations within each pair in the activation space of 16-layer deep neural networks (DNNs) of  
 118 the VGG-16 architecture (20), trained on either face identification (21) or on object categorisation (20). Both networks were  
 119 implemented in the Matconvnet toolbox for Matlab and were pretrained on their respective tasks by the original authors.  
 120 To gain an intuitive understanding of the face pair arrangement performed by humans and DNNs, we visualised the mean  
 121 ranking of face pairs from the face pairs perceived as maximally different to the ones that were perceived as the same (plotting

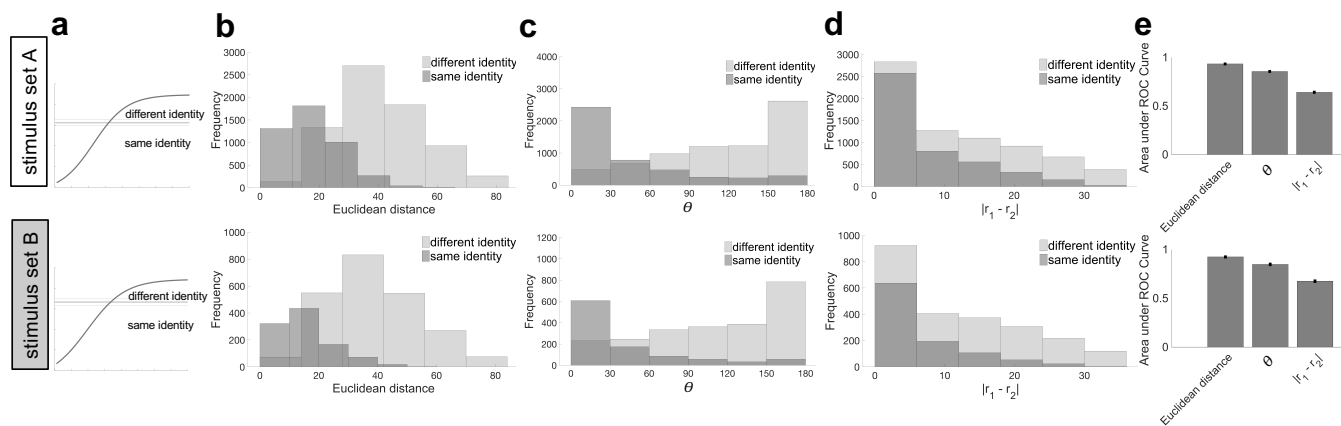

**Fig. 3.** Identity judgements as a function of geometry within the BFM.

**a)** Threshold for judging faces as belonging to the same/different identity, visualised relative to similarity judgements. Curved line shows the sigmoidal fit to face dissimilarity judgements (from Figure 2c) in stimulus set A (top) and B (bottom). Thick horizontal line shows the mean placement of the "different identity" threshold bar, across participants and trials; thinner lines above and below indicate the standard error of the mean over participants.

**b)** Histogram of how frequently face-pairs were judged as having the same identity (dark grey) or different identity (light grey), as a function of their Euclidean distance in the BFM.

**c)** Histogram of same and different identity judgements as a function of angle ( $\theta$ ) between faces in the BFM.

**d)** Histogram of same and different identity judgements as a function of the absolute difference between vector lengths in BFM ( $r_1$  and  $r_2$ ).

**e)** Summary of how well each of the three BFM metrics in b-d discriminates face pairs judged as having the same vs different identity. Bars show area under the receiver operating characteristic (ROC) curve calculated based on identity judgements using Euclidean distance,  $\theta$ , and absolute difference between  $r_1$  and  $r_2$ .

122 every 20 face pairs for clarity, see Figure 4 for the stimulus set A and B experiments).

123 To determine how face dissimilarity judgements performed by humans related to the dissimilarity of face image features from  
 124 one of the current best models of face perception (VGG-Face), we displayed the dissimilarity ratings in VGG-Face alongside  
 125 human face dissimilarity judgements. Visual inspection suggests that VGG-Face arranged face pairs somewhat differently than  
 126 humans do. To quantify this, we computed the Pearson correlation between ranks of each subject dissimilarity judgements and  
 127 VGG-Face. We also computed the Pearson correlation between ranks of each subject dissimilarity judgements and the mean  
 128 dissimilarity judgements. The mean correlation between VGG-Face rankings and each human face dissimilarity rankings was  
 129 0.40 (Figure 4). Is the correlation between face pair arrangement across participants and VGG arrangement lower or higher than  
 130 the correlation of each subject dissimilarity judgements and the mean dissimilarity judgements? We found that the former is  
 131 the case as the correlation between each subject dissimilarity judgements rank and the mean dissimilarity judgements was 0.63.  
 132 We observed similar results in the stimulus set B experiment (Figure 4) with the mean correlation between VGG-Face rankings  
 133 and each subject face dissimilarity rankings being 0.35 and the correlation between each subject dissimilarity judgements rank  
 134 and mean dissimilarity judgements rank being 0.60 (Figure 4). This result suggests that the VGG approximates the ranks of  
 135 face pairs to a certain extent, but not fully, considering the between-subject variability.

136 **Configural information and high-level person characteristics poorly predict perceived face dissimilarity.** After es-  
 137 tablishing that face dissimilarity judgements can be predicted from the Euclidean distance relatively well and that VGG-Face  
 138 can approximate face dissimilarity ranks in humans to a similar level as another human face dissimilarity ratings, we wanted to  
 139 test a wide range of models to examine whether there is one model that best explains face dissimilarity judgements or there are  
 140 multiple models that can explain the data equally well.

141 All models tested are schematically presented in Figure 5a. Several models were based on the BFM: BFM shape dimensions,  
 142 BFM texture dimensions, full BFM (texture and shape dimensions together), one-dimensional projections in BFM onto which  
 143 height, weight, age and gender were loaded most strongly, and angle in BFM between two face vectors. Alternative models  
 144 consisted of a 3D mesh model, RGB pixels, GIST, and face configurations ("0th order" configuration (location of 30 key points  
 145 such as eyes, nose, mouth), "1st order" configuration (distances between key points), and "2nd order" configuration (ratios of  
 146 distances between key points)). Finally, the last class of models consisted of DNNs (VGG-16 architecture) trained on either  
 147 object recognition or face identity recognition.

148 We inferentially compared each model's ability to predict face dissimilarity judgements, in both their raw state and after fitting  
 149 a sigmoidal transform to model-predicted dissimilarities, using a procedure cross-validated over both participants and stimuli  
 150 (see Methods). The highest-performing model was the VGG deep neural network trained on face identification, which was  
 151 the only model to predict human responses as well as the responses from other participants (i.e. not significantly below the  
 152 noise ceiling; Figure 5b). However, several other models had high performances that were not statistically different from that  
 153 of VGG-Face: Euclidean distance in BFM shape subspace, GIST, an object-trained Alexnet DNN, full BFM space, and BFM  
 154 texture subspace (Figure 5b, top). Therefore there is no one best model, but several different models are equally good at  
 155 explaining face dissimilarity data. Performing the same analysis on the independent stimulus set B experiment revealed good

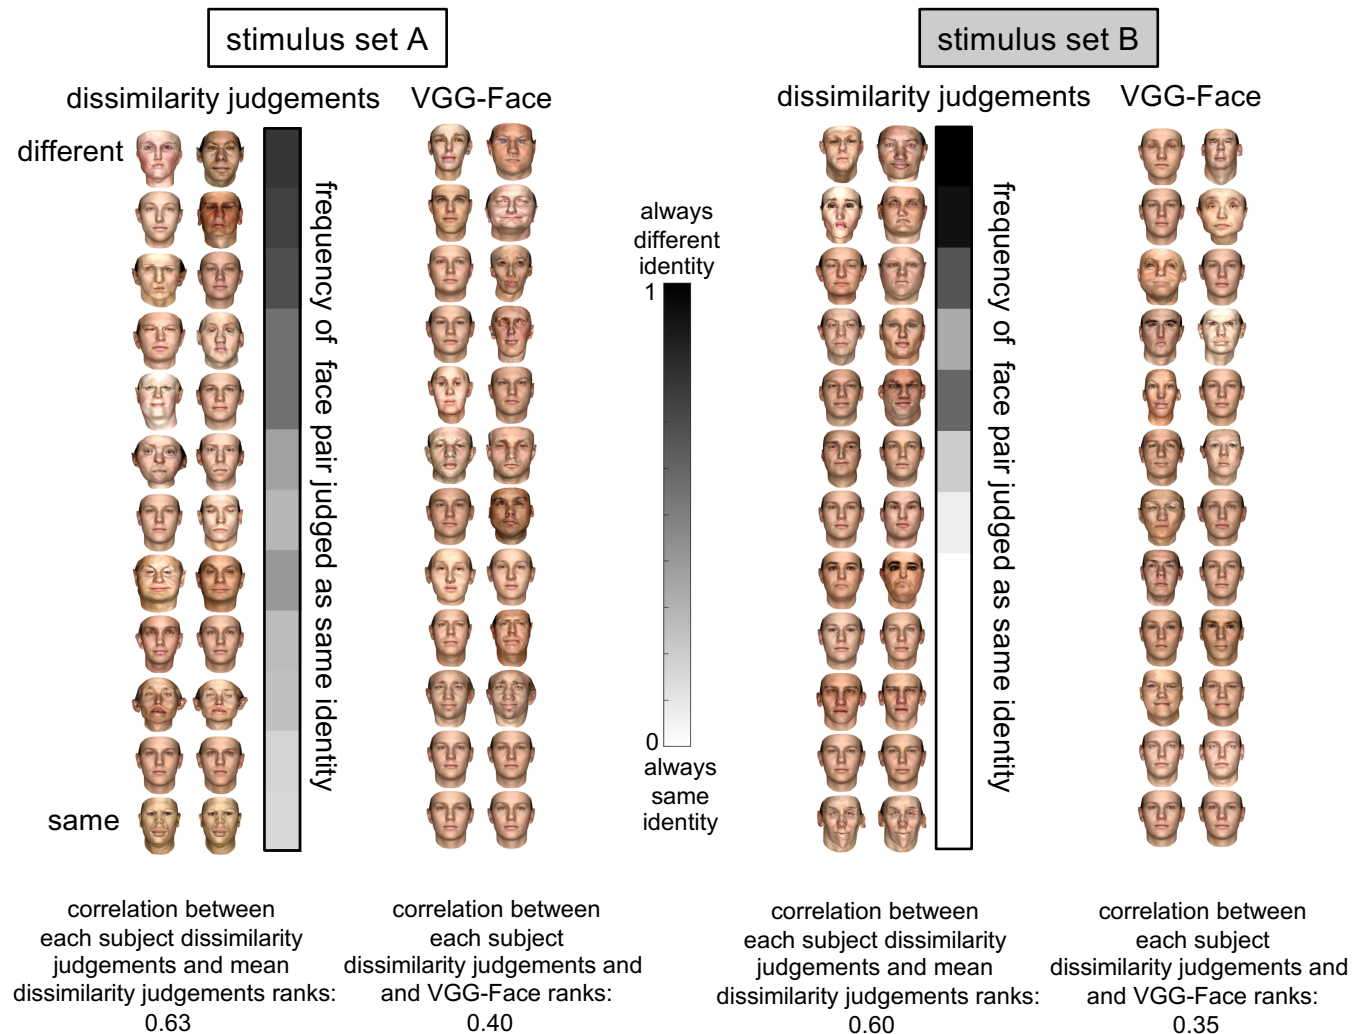

**Fig. 4.** Face dissimilarity rankings by humans, and by a deep neural network trained on face identity recognition (VGG-Face). Within stimulus sets A (left) and B (right), leftmost column displays face pairs according to their average rated dissimilarity by humans from most dissimilar (top) to most similar (bottom), visualising every 20th face pair in each ranked set. Rightmost column shows the same visualisation of rankings, performed based on the Euclidean distance between representations in a DNN trained on face recognition (VGG-Face). Colorbars to the right of human dissimilarity rankings show the frequency with which participants classified the corresponding face pair as depicting the same identity, from white (0; faces were always judged as having the same identity) to black (1; faces were always judged as having different identities).

156 reproducibility of the model rankings, even though the individual faces are different (Figure 5b, bottom). VGG-Face again  
157 achieved the highest performance, but was not significantly superior to several other models: VGG-Object, Alexnet, GIST, full  
158 BFM space, or the shape or texture subspaces of BFM. Most models reached the noise ceiling in this second dataset, but this is  
159 likely because there was greater overall measurement noise, due to a smaller sample size and one rather than two experimental  
160 sessions.

161 There are substantial computational differences between the several models that all predict human perceived face dissimilarity  
162 well. Do they explain shared or unique variance in human judgements? To address this question we performed a unique variance  
163 analysis on all models. Several models explained a significant amount of unique variance, with VGG-Face explaining the most  
164 unique variance in both stimulus set A and stimulus set B experiments (Figure 5c). If some models explain unique variance,  
165 perhaps combining them would explain more overall variance in face dissimilarity judgements? To address this question, we  
166 combined all models into one model via linear weighting, and asked whether this combined model explains more variance  
167 than each of the models alone. Model weights were assigned within the same procedure individual models were evaluated,  
168 cross-validating over both participants and stimuli. We found that in both datasets, the combined weighted model reached high  
169 performance, but did not exceed the performance of the best individual model (Figure 5b).

170 Models based on BFM or DNN feature spaces outperformed most others, including models based on the face perception  
171 literature (angle in 'face space', and configurations of facial features) and two 'baseline' models (based on pixels or 3D face  
172 meshes). The success of the V1-like GIST model is surprising and may be due not to its unique explanatory power, but its high  
173 shared variance with more complex models for the image set used, although it is consistent with previous work finding that  
174 Gabor-based models explain variance in face matching experiments (22) and explain almost all variance in the face- and other  
175 complex shape-matching experiments when stimuli are tightly controlled (23). A person-attributes model, consisting only of  
176 the four dimensions which capture the highest variance (among the scanned individuals) in height, weight, age, and gender,  
177 did not perform well. This finding may seem surprising given that an earlier systematic attempt to predict face dissimilarity  
178 judgements from image-computable features found that dissimilarity was best predicted by weighted combinations of features  
179 that approximated natural high-level dimensions of personal characteristics such as age and weight (24). However, it seems that  
180 people use other or more than socially relevant dimensions when judging face dissimilarity in the experiment presented here.

181 Some may find it surprising that VGG trained on faces did not perform better than VGG trained on objects (as elaborated on  
182 in the discussion section). For both VGG trained on faces and VGG trained on objects late intermediate layers explained most  
183 variance in face dissimilarity ratings in the stimulus set A experiment and the stimulus set B experiment (Figure 6a). Our finding  
184 is consistent with a previous study that showed late and intermediate layers of object-trained VGG explaining more variance  
185 in object similarity judgements (25). Late intermediate layers were also the only layers that explained unique variance (up to  
186 0.3% of total variance) in both the stimulus set A and stimulus set B experiments where we compared each model individually  
187 (Figure 6b). These results suggest that similar stages of processing are important for explaining both total and unique variance  
188 by VGG-Object and VGG-Face.

189 All models better predicted human responses after fitting a sigmoidal function to their raw predicted distances, and produced a  
190 greater relative improvement for more poorly-performing models, but did not substantially affect model rankings (Figure 5b).

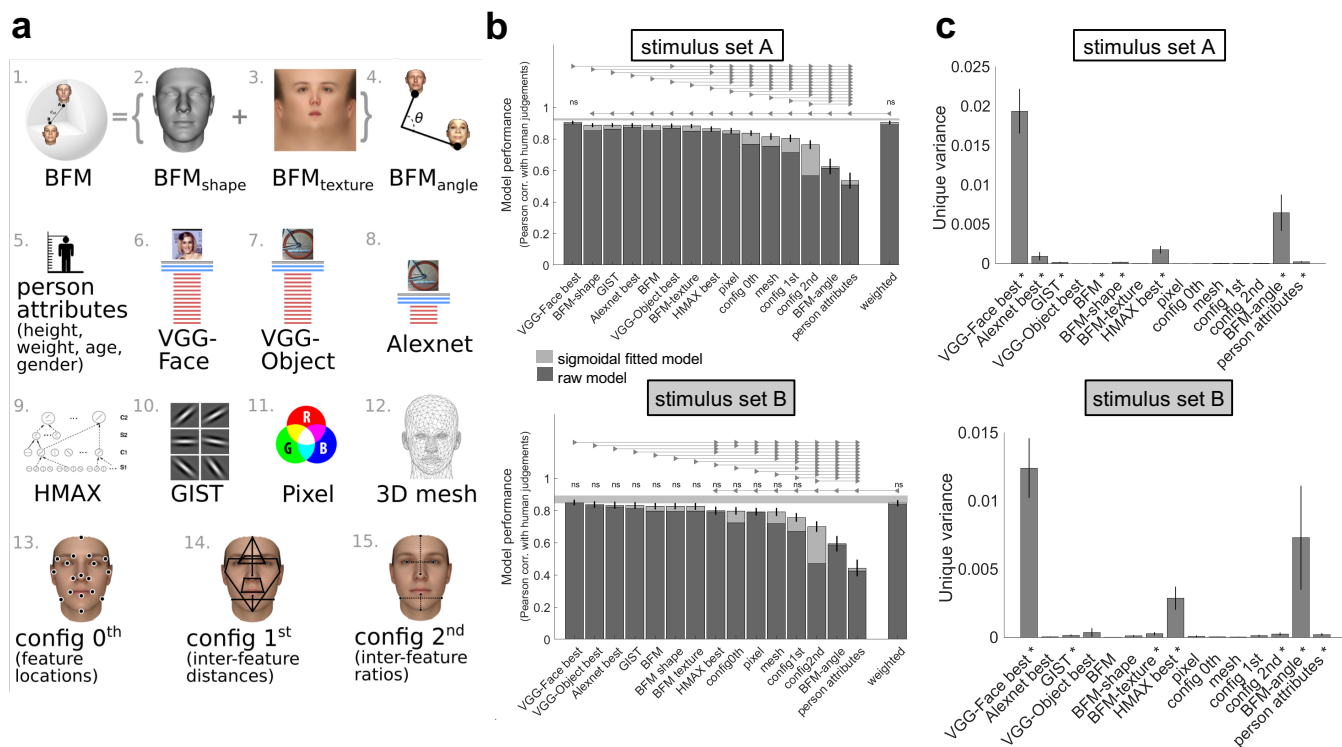

**Fig. 5.** Comparing diverse models in their ability to predict face dissimilarity judgements.

**a** Schematic illustration of models compared (see Methods Table 1 for full details). Several models were based on the morphable model from which faces were generated: 1. Euclidean distance within the full BFM coordinate space; 2. distance in the BFM's shape subspace; 3. in the BFM's texture subspace; 4. angle between faces in the full BFM; and 5. distance within the height, weight, age and gender dimensions of the BFM. Deep neural network (DNN) models consisted of a 16 layer VGG architecture trained on either (6.) faces or (7.) objects, and (8.) an 8-layer Alexnet architecture trained on objects. Alternative models were: 9. a shallower HMAX neural network; 10. GIST image descriptors; 11. raw pixel values; 12. raw 3D face mesh; and configural models: 13. "0th order" configuration (location of 30 key points such as eyes, nose, mouth); 14. "1st order" configuration (distances between key points); and "2nd order" configuration (ratios of distances between key points).

**b** Ability of each model to predict face dissimilarity judgements in stimulus set A (top) and B (bottom). Bars show Pearson correlation between human-judged face dissimilarity and face-pair distance within each model. The dark lower region of each bar shows performance for raw model distances, while the paler upper region shows additional performance gained if model distances are transformed by a compressive nonlinearity (a sigmoidal function fitted to data from training participants and face-pair stimuli). All models were significantly correlated with human data ( $p < 0.05$  corrected). The grey bar represents the noise ceiling, which indicates the expected performance of the true model given the noise in the data. The final bar shows the performance of a linear weighted combinations of all models, fitted using non-negative least-squares. Fitting of sigmoidal transforms and linear reweighting was performed within the same cross-validation procedure, fitting and evaluating on separate pools of both participants and stimuli. Error bars show the standard error of the mean (95% confidence interval over 1,000 bootstrap samples). Horizontal lines show pairwise differences between model performance ( $p < 0.05$ , Bonferroni corrected across all comparisons). Models connected by triangular arrow markers indicate a significant difference, following the convention in (26), with the direction of the arrow marker showing which model is superior. All statistical tests shown were performed on the sigmoidally-transformed version of each model, since these had the highest performance in all cases.

**c** Unique variance in face dissimilarity judgements computed using a hierarchical general linear model (GLM) for stimulus set A (top) and B (bottom). For each model, the unique variance is computed by subtracting the total variance explained by the reduced GLM (excluding the model of interest) from the total variance explained by the full GLM, using non-negative least squares to find optimal weights. Models that explain significant unique variance are indicated by an asterisk (one-sided Wilcoxon signed-rank test,  $p < 0.05$  corrected). Error bars show the standard error of the mean based on single-subject unique variance.



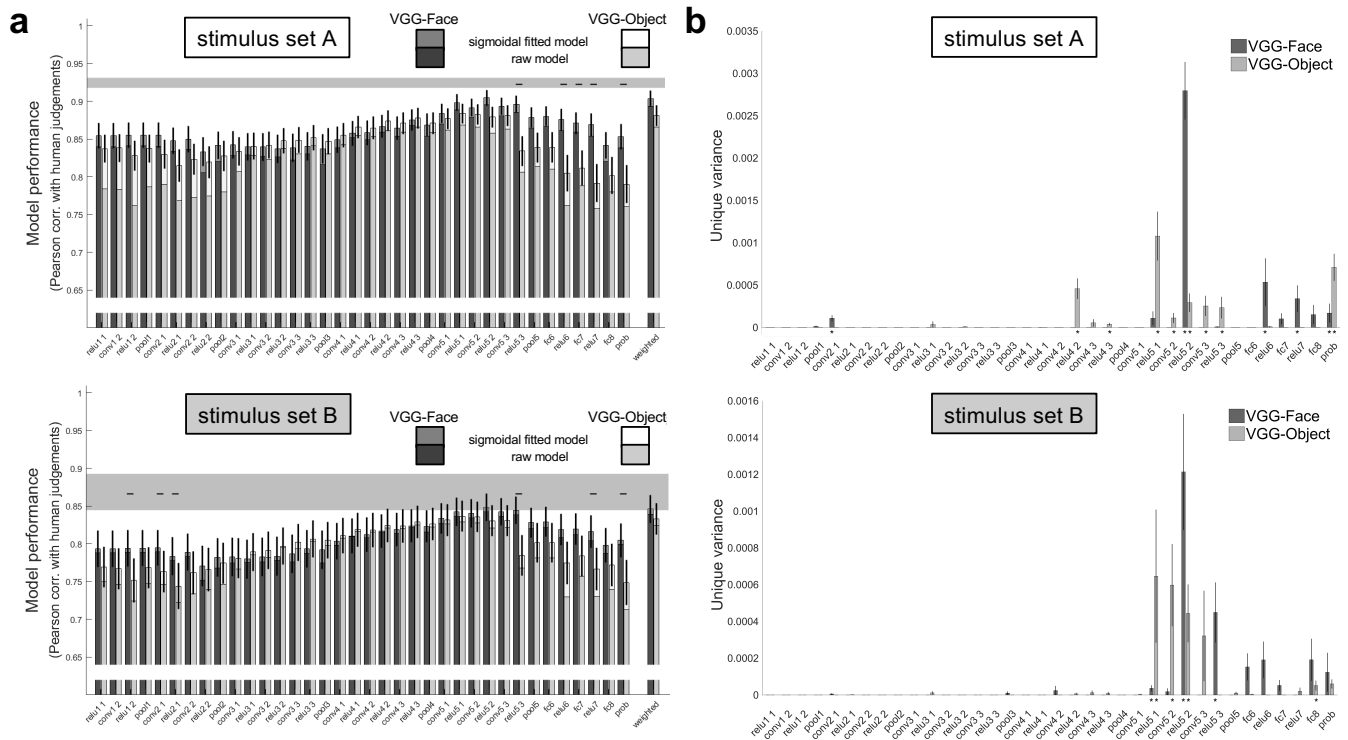

**Fig. 6.** Ability of each layer within VGG-Face and VGG-Object neural networks to predict human face dissimilarity judgements.

**a)** Correlations between human dissimilarity judgements in stimulus set A (top) and B (bottom) and Euclidean distance within each layer of the same deep neural network trained either to recognise faces (VGG-Face) or objects (VGG-Object). All key processing steps within each network are shown, including application of a non-linearity ('relu'), convolutional layers ('conv'), max-pooling ('pool'), and fully-connected layers ('fc'). The darker lower part of each bar shows performance of raw predicted distances, and paler upper parts show the same after fitting a sigmoidal transform, cross-validated over both participants and stimuli. The final bars show the performance of a linearly-weighted combination of all layers. Conventions are as in Figure 5b.

**b)** Unique variance in face dissimilarity judgements explained by each layer of each network, for stimulus set A (top) and in the stimulus set B experiment (bottom) using the same conventions as in Figure 5c).

## Discussion

We have shown that the Euclidean distance in the BFM is a good approximator of human dissimilarity judgements. To our knowledge, this is the first time the BFM has been validated as providing quantitative predictions of perceived face dissimilarity and identity. The BFM was previously shown to capture face impressions (27) and personality traits (28). The BFM's statistical face model is derived from separate principal components analyses of 3D face structure and of facial texture and colouration. It is, therefore, a more sophisticated statistical model than earlier PCA-based face space models derived from 2D images, which only moderately well predict face dissimilarity (29). In our study, BFM has a dual role of being a good model and stimulus generator.

The success of the Euclidean distance alone to predict both dissimilarity and identity is striking, given that psychological face space accounts have assigned particular importance to the geometric relationships of faces relative to a meaningful origin of the space (2, 11, 12, 30, 31). For example, it has been reported that there are larger perceptual differences between faces that span the average face than not (32). Extensive behavioural and neuropsychological work has sought to relate the computational mechanisms underlying face perception to geometric relationships in neural or psychological face space. It has been proposed that face-selective neurons explicitly encode faces in terms of vectors of deviation from an average face, based on evidence from monkey electrophysiology (33, 34) and human psychophysical adaptation (2) although alternative interpretations of the latter have been made (35, 36). Our comprehensive sampling of face pairs with the full range of possible geometric relationships was tailored to reveal the precise manner in which distances from the origin, and angular distances between faces, affect perceived dissimilarity. Yet both dissimilarity and identity data were explained best by simply the Euclidean distance, with geometric relationships in face space accounting for no additional variance. The BFM angle model did explain unique variance, however, the amount of variance explained was not enough to explain additional variance when combined with the BFM Euclidean distance model. Our results do not contradict previous studies, but suggest that effects of relative geometry may be more subtle than previously thought, when probed with large sets of faces that vary along diverse dimensions, rather than stimulus sets constructed to densely sample single or few dimensions (e.g. (31, 32)). Lastly, distances within BFM appear approximately but not exactly perceptually isotropic, as face dissimilarity judgements with different face exemplars but the same Euclidean distances and relative geometries were highly correlated, but less so than dissimilarity judgements with the same exemplars. One confounding factor here is however that the stimulus set B experiment was performed 6 months after the stimulus set A experiment, therefore, the differences in correlations between sessions could be attributed to the longer time between sessions with different face exemplars.

Distance within the BFM is not a perfect predictor of perceived dissimilarity. Firstly, like all morphable models, the BFM describes only the physical structure of faces, and so cannot account for effects of viewing factors such as pose and illumination, nor of familiarity, which we know to be substantial (cf. (30)). Relatedly, we did not explore people's ability to parse structural differences between faces from sources of accidental differences between face images that are important for face recognition (lighting (37, 38) and viewpoint(37, 39)). It is hard to predict how differences in lighting or viewpoint would affect the performance of the models but it may further differentiate image-based models (e.g. GIST) from BFM that is invariant and capture the distance between faces in principal-components space. DNNs lie on a continuum between image-dependent and invariant models as they learn partly invariant features during training. It is non-trivial that within the domain of highly controlled frontal well-lit viewing conditions tested here, the BFM better predicts perceived dissimilarity than other structure-only models, such as geometric mesh dissimilarity. Secondly, the BFM distance is imperfect as a dissimilarity predictor in that there remains unexplained variance that is reliable across individual observers but not captured by any BFM model. There are several possible reasons for this. The BFM has limitations as a morphable model, for example, it is based on the head scans of only 200 individuals, and this sample is biased in several ways, for example towards white, relatively young, faces. The sub-optimal performance could also be due to fundamental limitations shared by any physically-based model (30), such as its inability to capture perceptual inhomogeneities relating to psychologically relevant distinctions such as gender, ethnicity, or familiarity. It would be interesting to test in the future whether newer morphable face space models capture more of the remaining variance in human dissimilarity judgements (9). The task presented here provides an efficient way to test the perceptual validity of future face space models.

We found that humans often classify pairs of images as depicting the same identity even with relatively large distances in the BFM. Two faces may be perceptibly different from one another, while nevertheless appearing to be "the same person." The ability of the visual system to generalise identity across some degree of structural difference may be analogous to invariance to position, size and pose in object recognition (40). Face images generated from a single identity form a complex manifold as they may vary in age, weight, expression, makeup, facial hair, skin tone colour, and more. Given that we need to robustly recognise identity despite changes in these factors, it may not be surprising that there is a high tolerance for facial features when we judge one's identity. The stimulus set contained very dissimilar faces, which provided an anchor for people's definition of "different" and may influence moderately-dissimilar faces to look quite alike, in comparison. Participants seemed to interpret person identity quite generously, possibly imagining whether this face could be the same person if they aged, got

248 tanned, or lost weight. "The same person" may be a not precisely defined concept, however people seem to agree what that  
249 concept means as they were consistent in judging the same/different identity boundary. Interestingly, the "different identity"  
250 boundary was close to the saturation point of face dissimilarity psychometric function. This result could be related to people  
251 dismissing all "different individuals" as completely-different and focusing their fine gradations of dissimilarity only within the  
252 range of faces that could depict the same identity. In our current experiment, the identity and face dissimilarity judgements are  
253 entangled and future experiments are needed to dissociate them.

254  
255 Our data show clearly that some models of face dissimilarity are worse than others. Simply taking the angle between faces  
256 in the BFM is a poor predictor, as is a set of higher-order ratios between facial features. Perhaps surprisingly, the model  
257 consisting only of the four dimensions which capture the highest variance in height, weight, age, and gender performed poorly.  
258 Age and gender were shown to explain variance in face MEG representations (41) and we show that they do explain variance  
259 in face dissimilarity judgements task, however to a lesser extent than better-performing models. It seems that people use other  
260 or more than socially relevant dimensions when judging face dissimilarity.

261  
262 Among highly performing models, we found that several explain face dissimilarity judgements similarly well. One of the  
263 models that explains a surprisingly large amount of variance is GIST. It has been previously shown, that Gabour-based models  
264 explain face representations well (14, 22). The models compared contain quite different feature spaces. For example, object-  
265 trained and face-trained VGG models learn distinctly different feature detectors (6), yet explain a similar amount of variance  
266 in human face dissimilarity judgements. Both object-trained and face-trained VGG models also explain a similar amount of  
267 variance in human inferior temporal cortex (42), and object-trained VGG explains variance in early MEG responses (43). The  
268 "face space" within a face-trained DNN organises faces differently than they are arranged in the BFM's principal components,  
269 for example, clustering low-quality images at the "origin" of the space, eliciting lower activity from all learned features (30).

270 It is perhaps remarkable that distances within the BFM are approximately as good at capturing perceived face dissimilarities as  
271 image-computable DNNs. Distances within the BFM contain no information about either the specific individuals concerned,  
272 or the image-level differences between the two rendered exemplars. DNNs, on the other hand, are image-computable and  
273 thus capture differences between the visible features in the specific rendered images seen by participants. The high success of  
274 the relatively impoverished BFM representation may highlight the importance of statistical face distributions to human face  
275 perception. After all, the BFM simply describes the statistical dissimilarity between two faces, expressed in units of standard  
276 deviations within the sample of 200 head-scanned individuals. The power of this statistical description is consistent with  
277 previous evidence for the adaptability of face representations, coming from face aftereffects (2, 34), the "own-race effect"  
278 (44, 45), and inversion and prototype effects (46)

279  
280 We expected that a 16-layer VGG deep neural network trained to discriminate faces would likely be a better model than the  
281 same architecture trained on objects. However, this was not the case. There are a couple of possible explanations for this  
282 surprising result. The first is that although there is no "human" category in the ILSVRC dataset on which the VGG-object  
283 network was trained (7), there are images with faces in them (e.g. the classes "T-shirt" and "bowtie"), some classes have more  
284 than 90% images with faces (e.g. the classes "volleyball" and "military uniform"), and as many as 17% of all images in the  
285 dataset have at least one face (47). Therefore, the network may still have learned facial features, even without being explicitly  
286 trained on face discrimination. Indeed, DNNs trained with a spatial correlation loss in addition to a classification objective,  
287 developed "face patches" when trained on the same ILSVRC dataset (48). Even when all faces were completely removed from  
288 the training set, a face-deprived DNN was still able to categorize and discriminate faces (49). However, the face-deprived  
289 training affected the degree of DNN's face selectivity and DNN's ability to replicate the face-inversion effect(49). Another  
290 possibility is that human face dissimilarity judgements are based on general-purpose descriptions of high-level image structure,  
291 which are not specific to faces. Consistent with our behavioural results, VGG trained on faces was not beneficial in explaining  
292 neural recordings of faces (50). These results are consistent with our finding that a general object recognition model seems to  
293 be sufficient to develop features that are diagnostic of face dissimilarity. Emerging classes of models, such as inverse graphics  
294 model based on DNNs (10), could be tested as additional model candidates in the future.

295  
296 One of the reasons for the equally high performance of disparate models is that, for our stimulus set, several models made  
297 highly correlated predictions, making it difficult to discriminate between them based on the current data. Model dissociation  
298 was also found to be difficult when studying the representations of face dissimilarity in human fusiform face area, where Gabor  
299 filters model performed similarly to face space sigmoidal ramp-tuning model (14). Stimulus optimisation methods could be  
300 used in the future to identify sets of stimuli for which current well-performing candidate models make maximally dissimilar  
301 predictions (26, 51, 52).

302  
303 We conclude that deep neural networks provide the best available models of perceived facial similarity, and indeed a face-  
304 trained DNN fully explains human judgements within two independent datasets. Meanwhile, the more moderate success of a

305 principal-components face space emphasises the importance of the natural distribution of faces in human face perception.

## 306 Methods

307 **Stimuli.** Each face generated by the BFM corresponds to a unique point in the model's 398-dimensional space (199 shape  
308 dimensions, and 199 texture dimensions), centred on the average face. The relative locations of any pair of faces can therefore  
309 be summarised by three values: the length of the vector from the origin to the first face  $r_1$ , the length of the vector from the  
310 origin to the second face  $r_2$ , and the angle between the two face vectors  $\theta$  (see Figure 1b). To create a set of face pairs spanning  
311 a wide range of relative geometries in face space, we systematically sampled all pairs of 8 possible vector length values (29  
312 unique combinations) combined with 8 possible angular values. Possible angular values were eight uniform steps between  
313 0 and 180 degrees, and possible vector lengths were eight uniform steps between 0 and 80 units in the BFM. This yielded  
314 232 unique relative geometries. For each relative geometry, we then sampled two random points in the full 398-dimensional  
315 BFM space that satisfied the given geometric constraints. We generated two separate sets of face pairs with the same relative  
316 geometries but different face exemplars, by sampling two independent sets of points satisfying the same geometric constraints.  
317 The two sets (stimulus set A and stimulus set B) were used as stimuli in separate experimental sessions (see "Psychophysical  
318 face pair-arrangement task").

319 **Participants.** Human behavioural testing took place over three sessions. Twenty-six participants (13 female) took part in  
320 sessions 1 and 2, and a subset of 15 (6 female) took part in session 3. All testing was approved by the MRC Cognition and  
321 Brain Sciences Ethics Committee and was conducted in accordance with the Declaration of Helsinki. Volunteers gave informed  
322 consent and were reimbursed for their time. All participants had normal or corrected-to-normal vision.

323 **Psychophysical face pair-arrangement task.** The procedure in all sessions was identical, the only difference being that the  
324 same set of face pair stimuli was used in sessions 1 and 2, while session 3 used a second sampled set with identical geometric  
325 properties. Comparing the consistency between sessions 1, 2, and 3 allowed us to gauge how strongly human judgements were  
326 determined by geometric relationships in face space, irrespective of the individual face exemplars.

327 During an experimental session, participants were seated at a comfortable distance in front of a large touch-screen computer  
328 display (43" Panasonic TH-43LFE8-IR, resolution 1920x1080 pixels). On each trial, the participant saw a large white "arena",  
329 with a randomly arranged pile of eight face pairs in a grey region to the right-hand side (see Figure 1c). The two faces  
330 within each pair were joined together by a thin bar placed behind the faces, and each pair could be dragged around the touch-  
331 screen display by touching. Each face image was rendered in colour with a transparent background and a height of 144 pixels  
332 (approximately 7.1cm on screen).

333 The bottom edge of the white arena was labelled "Identical" and the top edge was labelled "Maximum difference". Two example  
334 face pairs were placed to the left and to the right of the "Identical" and "Maximum difference" labels to give participants  
335 reference points on what identical and maximally different faces look like. The maximally different example faces had the  
336 largest geometric distance possible within the experimentally sampled geometric relationships (i.e. the Euclidean distance in  
337 the BFM = 80) in contrast to identical faces (i.e. the Euclidean distance in the BFM = 0). The same example pairs were used  
338 for all trials and participants.

339 Participants were instructed to arrange the eight face pairs on each trial vertically, according to the dissimilarity of the two faces  
340 within the pair. For example, two identical faces should be placed at the very bottom of the screen. Two faces that look as  
341 different as faces can look from one another should be placed at the very top of the screen. Participants were instructed that  
342 only the vertical positioning of faces would be taken into account (horizontal space was provided so that face pairs could be  
343 more easily viewed, and so that face pairs perceived as being equally similar could be placed at the same vertical location). On  
344 each trial, once the participant had finished vertically arranging face pairs by dissimilarity, they were asked to drag an "identity  
345 line" (see Figure 1c) on the screen to indicate the point below which they considered image pairs to depict "the same person".  
346 Once eight face pairs and the identity line were placed, participants pressed the "Done" button to move to the next trial. Each  
347 session consisted of 29 trials.

348 **Representational similarity analysis.** We used representational similarity analysis (RSA) to evaluate how well each of a set  
349 of candidate models predicted human facial (dis)similarity judgements (53). For every model, a model-predicted dissimilarity  
350 was obtained by computing the distance between the two faces in each stimulus pair, within the model's feature space, using  
351 the model's distance metric (see "Candidate models of face dissimilarity"). Model performance was defined as the Pearson  
352 correlation between human dissimilarity judgements and the dissimilarities predicted by the model. We evaluated the ability  
353 to predict human data both for each individual model and for a linearly weighted combination of all models. To provide an  
354 estimate of the upper bound of explainable variance in the dataset, we calculated how well human data could be predicted by  
355 data from other participants, providing a "noise ceiling".

356 Noise ceilings, raw model performance, sigmoidally-transformed model performance, and reweighted combined model per-  
357 formance were all calculated within a single procedure, cross-validating over both participants and stimuli (54). On each of

358 20 cross-validation folds, 5 participants and 46 face pairs were randomly assigned as test data, and the remaining stimuli and  
359 participants were used as training data. On each fold, a sigmoidally-transformed version of each model was created, by fitting  
360 a logistic function to best predict dissimilarities for training stimuli, averaged over training participants, from raw model dis-  
361 tances. Also on each fold, a reweighted combined model was created using non-negative least-squares to assign one positive  
362 weight to each of the individual models, to best predict the dissimilarity ratings for training stimuli, averaged over training  
363 participants. We then calculated, for each raw model, each sigmoidally transformed model, and for the combined reweighted  
364 model, the Pearson correlation with the model's predictions for test stimuli for each individual test subject's ratings. The av-  
365 erage correlation over test participants constituted that model's performance on this cross-validation fold. The upper bound of  
366 the noise ceiling was calculated within the same fold by correlating each test subject's test-stimulus data with the average test-  
367 stimulus data of all test participants (including their own). The lower bound was calculated by correlating each test subject's  
368 test-stimulus data with the average for all training subject's test-stimulus data (54, 55). Means and confidence intervals were  
369 obtained by bootstrapping the entire cross-validation procedure 1,000 times over both participants and stimuli.

370 We first determined whether each model was significantly different from the lower bound of the noise ceiling, by assessing  
371 whether the 95% confidence interval of the bootstrap distribution of differences between model and noise ceiling contained  
372 zero (54, 55), Bonferroni corrected for the number of models. Models that are not significantly different from the lower bound  
373 of the noise ceiling can be considered as explaining all explainable variance, given the noise and individual differences in the  
374 data. We subsequently tested for differences between the performance of different models. We defined a significant pairwise  
375 model comparison likewise as one in which the 95% confidence interval of the bootstrapped difference distribution did not  
376 contain zero, Bonferroni corrected for the number of pairwise comparisons.

377 **Unique variance analysis.** We used a hierarchical general linear model (GLM) to evaluate unique variance explained by best  
378 performing models (56). For each model, the unique variance was computed by subtracting the total variance explained by the  
379 reduced GLM (excluding the model of interest) from the total variance explained by the full GLM. We performed this procedure  
380 for each participant and used non-negative least squares to find optimal weights. A constant term was included in the GLM  
381 model. We performed a one-sided Wilcoxon signed-rank test to evaluate the significance of the unique variance contributed by  
382 each model across participants.

383 **Candidate models of face dissimilarity.** We considered a total of 15 models of face dissimilarity, each consisting of a set of  
384 features derived from the face image, the BFM coordinates, or 3D mesh, and a distance metric (see Table 1).

385 **Basel Face Model.** We considered four variant models based on the principal-component space provided by the BFM: (1)  
386 "BFM Euclidean" took the Euclidean distances between faces in the full 398-dimensional BFM space; (2) "BFM-shape" took  
387 the Euclidean distances only within the 199 components describing variations in the 3D shape of faces; (3) "BFM-texture" took  
388 the Euclidean distances only within the 199 separate components describing variations in the RGB texture maps that provided  
389 faces' pigmentation and features; and (4) "BFM angle" which took the cosine distance between face vectors in the full 398-  
390 dimensional space. For face pairs where cosine distance was undefined, because one face lay at the origin of BFM space, the  
391 angle between the two faces was defined as zero for the purposes of model evaluation.

392 To more fully explore the relationship between apparent dissimilarity and placements of faces in the full BFM space, we also  
393 considered linear and sigmoidal functions as candidates for predicting the relationship between the Euclidean distance in the  
394 BFM and face dissimilarity judgements. We estimated each model's predictive performance as the Pearson correlation between  
395 the fitted model's predicted dissimilarities and the dissimilarities recorded by the subject. We tested for significant differences  
396 between linear and sigmoidal function fits using a two-sided Wilcoxon signed-rank test. For each subject, we fitted the model  
397 to half of the data (session 1) and measured the predictive accuracy of the model in the second half of the data (session 2). The  
398 predictive accuracies were averaged across participants.

399 **Person attributes.** The BFM provides the axes onto which the height, weight, age, and gender of the 3D scanned participants  
400 most strongly loads. By projecting new face points onto these axes, we can approximately measure the height, weight, age and  
401 gender of each generated face. The "Person attributes" model took the Euclidean distance between faces, after projecting faces  
402 onto these four dimensions.

403 **Models based on 3D face structure.** Face perception is widely thought to depend on spatial relationships among facial features  
404 (4, 17, 60, 61). We calculated the Euclidean distance between the 3D meshes that were used to render each face ("Mesh"  
405 model). We also used the geometric information within each face's mesh description to calculate a first, second, and third-  
406 order configural model of facial feature arrangements, following suggestions by (60) and others (e.g. (17)) that face perception  
407 depends more strongly on distances or ratios of distances between facial features than raw feature locations. We selected 30  
408 vertices on each face corresponding to key locations such as the centre and edges of each eye, the edges of the mouth, nose,  
409 jaw, chin, and hairline (see schematic in Figure 5a), using data provided in the BFM. The positions of these 30 vertices on each  
410 3D face mesh formed the features for the "0th order" configural model. We then calculated 19 distances between horizontal

| Candidate models     |                                                                                                            |           |                 |                     |
|----------------------|------------------------------------------------------------------------------------------------------------|-----------|-----------------|---------------------|
| Model name           | Description                                                                                                | Reference | Distance metric | Computed from       |
| 1. BFM               | Morphable face space combining PCA subspaces of structural and textural components from 200 3D face scans. | (8)       | Euclidean       | BFM PCA coordinates |
| 2. BFM shape         | PCA subspace of only the structural components from 200 3D face scans.                                     | (8)       | Euclidean       | BFM PCA coordinates |
| 3. BFM texture       | PCA subspace of only the textural components from 200 3D face scans.                                       | (8)       | Euclidean       | BFM PCA coordinates |
| 4. BFM angle         | PCA subspace of only the structural components from 200 3D face scans.                                     | (8)       | Cosine          | BFM PCA coordinates |
| 5. Person attributes | Loading of PCA coordinates onto height, weight, age and gender vectors.                                    | (8)       | Euclidean       | BFM PCA coordinates |
| 6. VGG-Face best     | Highest-performing layer of 16-layer deep neural network trained on face identification.                   | (20)      | Euclidean       | RGB image           |
| 7. VGG-Object best   | Highest-performing layer of 16-layer deep neural network trained on object recognition.                    | (21)      | Euclidean       | RGB image           |
| 8. AlexNet best      | Highest-performing layer of 8-layer deep neural network trained on object recognition.                     | (57)      | Euclidean       | RGB image           |
| 9. HMAX best         | Highest-performing layer in a 4-layer cortically-inspired neural network.                                  | (58)      | Euclidean       | RGB image           |
| 10. GIST             | Gabor-based summary of contrast energy at different orientations and scales.                               | (59)      | Euclidean       | RGB image           |
| 11. Pixel            | Raw image data.                                                                                            | n/a       | Euclidean       | RGB image           |
| 12. Mesh             | Raw 3D mesh data.                                                                                          | n/a       | Euclidean       | 3D mesh             |
| 13. Config 0th       | Locations of key facial features (0th order configural information).                                       | (60)      | Euclidean       | 3D mesh             |
| 14. Config 1st       | Distances between key facial features (1st order configural information).                                  | (60)      | Euclidean       | 3D mesh             |
| 15. Config 2nd       | Ratios of distances between key facial features (2nd order configural information).                        | (60)      | Euclidean       | 3D mesh             |

**Table 1.** Candidate models of face dissimilarity.

411 and vertically aligned features (e.g. width of nose, length of nose, separation of eyes), which formed the "1st order" configural  
 412 model. Finally, we calculated 19 ratios among these distances (e.g. ratio of eye separation to eye height; ratio of nose width to  
 413 nose length), which formed the "2nd order" configural model.

414 **Deep neural networks.** We used a state-of-the-art 16-layer convolutional neural network (VGG-16), trained on millions of  
 415 images to recognize either object classes (20) or facial identities (21). The dissimilarity predicted by DNN models was defined  
 416 as the Euclidean distance between activation patterns elicited by each image in a face pair in a single layer. To input to DNN  
 417 models, faces were rendered at the VGG network input size of 124x124 pixels, on a white background, and preprocessed to  
 418 subtract the average pixel value of the network's training image set.

419 **Low-level image-computable models.** As control models, we also considered the dissimilarity of two faces  
 420 within in terms of several low-level image descriptors: (1) Euclidean distance in raw RGB pixel space; (2)

421 Euclidean distance within a "GIST" descriptor, image structure at four spatial scales and eight orientations  
422 (<https://people.csail.mit.edu/torrallba/code/spatialenvelope/>); and (3) HMAX, a simple four-layer neural network  
423 (<http://cbcl.mit.edu/jmutch/hmin/>). For comparability with the images seen by participants, all low-level image-computable  
424 models operated on faces rendered on a white background at 144x144 pixel resolution.

#### 425 ACKNOWLEDGEMENTS

426 This research was supported by the Wellcome Trust [grant number 206521/Z/17/Z] awarded to KMJ; the Alexander von Humboldt Foundation postdoctoral fellowship awarded  
427 to KMJ; the Alexander von Humboldt Foundation postdoctoral fellowship awarded to KRS; the Wellcome Trust and the MRC Cognition and Brain Sciences Unit. For the  
428 purpose of open access, the author has applied a CC BY public copyright licence to any Author Accepted Manuscript version arising from this submission.

#### 429 COMPETING FINANCIAL INTERESTS

430 The authors declare that they have no competing interests.

#### 431 AUTHOR CONTRIBUTIONS

432 JOK, KMJ and NK designed the experiments. KMJ collected the data. KMJ, JOK and KRS performed the analyses. KMJ and KRS wrote the paper. All authors edited the  
433 paper. NK supervised the work.

#### 434 DATA AND CODE AVAILABILITY

435 The datasets and code generated during the current study are available from the corresponding author on reasonable request.

## 436 References

- 437 1. Nancy Kanwisher. Domain specificity in face perception. *Nature neuroscience*, 3(8):759–763, 2000.
- 438 2. Gillian Rhodes and David A Leopold. Adaptive norm-based coding of face identity. *The Oxford handbook of face perception*, pages 263–286, 2011.
- 439 3. Doris Y Tsao and Margaret S Livingstone. Mechanisms of face perception. *Annu. Rev. Neurosci.*, 31:411–437, 2008.
- 440 4. Martha J Farah, Kevin D Wilson, Maxwell Drain, and James N Tanaka. What is "special" about face perception? *Psychological review*, 105(3):482, 1998.
- 441 5. Yann LeCun, Yoshua Bengio, and Geoffrey Hinton. Deep learning. *nature*, 521(7553):436–444, 2015.
- 442 6. Katherine R. Storrs and Nikolaus Kriegeskorte. Deep learning for cognitive neuroscience. In David Poeppel, George R. Mangun, and Michael S. Gazzaniga, editors, *The Cognitive Neurosciences*. MIT Press, 2020.
- 443 7. Olga Russakovsky, Jia Deng, Hao Su, Jonathan Krause, Sanjeev Satheesh, Sean Ma, Zhiheng Huang, Andrej Karpathy, Aditya Khosla, Michael Bernstein, et al. Imagenet large scale visual  
444 recognition challenge. *International journal of computer vision*, 115(3):211–252, 2015.
- 445 8. Pascal Paysan, Reinhard Knothe, Brian Amberg, Sami Romdhani, and Thomas Vetter. A 3d face model for pose and illumination invariant face recognition. In *2009 Sixth IEEE International  
446 Conference on Advanced Video and Signal Based Surveillance*, pages 296–301. IEEE, 2009.
- 447 9. Bernhard Egger, William A. P. Smith, Ayush Tewari, Stefanie Wuhrer, Michael Zollhoefer, Thabo Beeler, Florian Bernard, Timo Bolkart, Adam Kortylewski, Sami Romdhani, Christian Theobalt,  
448 Volker Blanz, and Thomas Vetter. 3d morphable face models – past, present and future. *arXiv*, 2020.
- 449 10. Ilker Yildirim, Mario Belledonne, Winrich Freiwald, and Josh Tenenbaum. Efficient inverse graphics in biological face processing. *Science Advances*, 6(10), 2020.
- 450 11. Tim Valentine. A unified account of the effects of distinctiveness, inversion, and race in face recognition. *The Quarterly Journal of Experimental Psychology Section A*, 43(2):161–204, 1991.
- 451 12. Tim Valentine, Michael B Lewis, and Peter J Hills. Face-space: A unifying concept in face recognition research. *Quarterly Journal of Experimental Psychology*, 69(10):1996–2019, 2016.
- 452 13. A Mike Burton and John R Vokey. The face-space typicality paradox: Understanding the face-space metaphor. *The Quarterly Journal of Experimental Psychology Section A*, 51(3):475–483, 1998.
- 453 14. Johan D. Carlin and Nikolaus Kriegeskorte. Adjudicating between face-coding models with individual-face fMRI responses. *PLOS Computational Biology*, 13(7):e1005604, 2017.
- 454 15. Neil MT Housby, Ferenc Huszar, Mohammad M Ghassemi, Gergő Orbán, Daniel M Wolpert, and Máté Lengyel. Cognitive tomography reveals complex, task-independent mental representations.  
455 *Current Biology*, 23(21):2169–2175, 2013.
- 456 16. Richard Russell, Irving Biederman, Marissa Nederhouser, and Pawan Sinha. The utility of surface reflectance for the recognition of upright and inverted faces. *Vision research*, 47(2):157–165,  
457 2007.
- 458 17. Pawan Sinha, Benjamin Balas, Yuri Ostrovsky, and Richard Russell. Face recognition by humans: Nineteen results all computer vision researchers should know about. *Proceedings of the IEEE*, 94  
459 (11):1948–1962, 2006.
- 460 18. Shany Grossman, Guy Gaziv, Erin M Yeagle, Michal Harel, Pierre Mégevand, David M Groppe, Simon Khuvis, Jose L Herrero, Michal Irani, Ashesh D Mehta, et al. Convergent evolution of face  
461 spaces across human face-selective neuronal groups and deep convolutional networks. *Nature communications*, 10(1):1–13, 2019.
- 462 19. Marieke Mur, Mirjam Meys, Jerzy Bodurka, Rainer Goebel, Peter a. Bandettini, and Nikolaus Kriegeskorte. Human object-similarity judgments reflect and transcend the primate-IT object representa-  
463 tion. *Frontiers in Psychology*, 4:1–22, 2013.
- 464 20. Karen Simonyan and Andrew Zisserman. Very deep convolutional networks for large-scale image recognition. *arXiv*, 2014.
- 465 21. Omkar M Parkhi, Andrea Vedaldi, and Andrew Zisserman. Deep face recognition. *arXiv*, 2015.
- 466 22. Irving Biederman and Peter Kalocsais. Neurocomputational bases of object and face recognition. *Philosophical Transactions of the Royal Society of London. Series B: Biological Sciences*, 352  
467 (1358):1203–1219.
- 468 23. Xiaomin Yue, Irving Biederman, Michael C Mangini, Christoph von der Malsburg, and Ori Amir. Predicting the psychophysical similarity of faces and non-face complex shapes by image-based  
469 measures. *Vision research*, 55:41–46, 2012.
- 470 24. Mark Steyvers and Tom Busey. Predicting similarity ratings to faces using physical descriptions. *Computational, geometric, and process perspectives on facial cognition: Contexts and challenges*,  
471 pages 115–146, 2000.
- 472 25. Kamila M. Jozwik, Nikolaus Kriegeskorte, Katherine R. Storrs, and Marieke Mur. Deep convolutional neural networks outperform feature-based but not categorical models in explaining object  
473 similarity judgments. *Frontiers in Psychology*, 8:1726, 2017.
- 474 26. Tal Golan, Prashant C Raju, and Nikolaus Kriegeskorte. Controversial stimuli: pitting neural networks against each other as models of human recognition. *arXiv*, 2019.
- 475 27. Ryan M. Stoller, Eric Hehman, Matthias D. Keller, Mirella Walker, and Jonathan B. Freeman. The conceptual structure of face impressions. *Proceedings of the National Academy of Sciences*, 115  
476 (37):9210–9215, 2018.
- 477 28. Selma Carolin Rudert, Leonie Reutner, Rainer Greifeneder, and Mirella Walker. Faced with exclusion: Perceived facial warmth and competence influence moral judgments of social exclusion.  
478 *Journal of Experimental Social Psychology*, 68:101–112, 2017.
- 479 29. Rainer Scheuchpenflug. Predicting face similarity judgements with a computational model of face space. *Acta psychologica*, 100(3):229–242, 1999.
- 480 30. Alice J O’Toole, Carlos D Castillo, Connor J Parde, Matthew Q Hill, and Rama Chellappa. Face space representations in deep convolutional neural networks. *Trends in cognitive sciences*, 22(9):  
481 794–809, 2018.
- 482 31. Kieran Lee, Graham Byatt, and Gillian Rhodes. Caricature effects, distinctiveness, and identification: Testing the face-space framework. *Psychological science*, 11(5):379–385, 2000.
- 483 32. Volker Blanz, Al ice J O’toole, Thomas Vetter, and Heather A Wild. On the other side of the mean: The perception of dissimilarity in human faces. *Perception*, 29(8):885–891, 2000.
- 484 33. Le Chang and Doris Y. Tsao. The Code for Facial Identity in the Primate Brain. *Cell*, 169(6):1013–1028.e14, 2017.
- 485 34. David A Leopold, Igor V Bondar, and Martin A Giese. Norm-based face encoding by single neurons in the monkey inferotemporal cortex. *Nature*, 442(7102):572–575, 2006.
- 486 35. David A Ross, Mickael Deroche, and Thomas J Palmeri. Not just the norm: Exemplar-based models also predict face aftereffects. *Psychonomic bulletin & review*, 21(1):47–70, 2014.
- 487 36. Katherine R Storrs and Derek H Arnold. Not all face aftereffects are equal. *Vision research*, 64:7–16, 2012.
- 488 37. H Hill. Information and viewpoint dependence in face recognition. *Cognition*, 62(2):201–222, 1997.
- 489 38. Chang Hong Liu, Charles A Collin, A.Mike Burton, and Avi Chaudhuri. Lighting direction affects recognition of untextured faces in photographic positive and negative. *Vision Research*, 39(24):  
490 4003–4009, 1999.
- 491 39. Vicki Bruce. Changing faces: Visual and non-visual coding processes in face recognition. *British Journal of Psychology*, 73(1):105–116, 1982.
- 492 40. James J DiCarlo and David D Cox. Untangling invariant object recognition. *Trends in cognitive sciences*, 11(8):333–341, 2007.
- 493 41. Katharina Dobs, Leyla Isik, Dimitrios Pantazis, and Nancy Kanwisher. How face perception unfolds over time. *Nature Communications*, 10(1):1258, 2019.
- 494 42. Kamila Maria Jozwik, Martin Schrimpf, Nancy Kanwisher, and James J. DiCarlo. To find better neural network models of human vision, find better neural network models of primate vision. *bioRxiv*,  
495 2019.
- 496 43. Kamila Maria Jozwik, Michael Lee, Tiago Marques, Martin Schrimpf, and Pouya Bashivan. Large-scale hyperparameter search for predicting human brain responses in the Algonauts challenge.  
497 *bioRxiv*, 2019.
- 498

- 499 44. John C Brigham and Roy S Malpass. The role of experience and contact in the recognition of faces of own-and other-race persons. *Journal of social issues*, 41(3):139–155, 1985.
- 500 45. Robert K Bothwell, John C Brigham, and Roy S Malpass. Cross-racial identification. *Personality and Social Psychology Bulletin*, 15(1):19–25, 1989.
- 501 46. Guy Wallis. Toward a unified model of face and object recognition in the human visual system. *Frontiers in psychology*, 4:497, 2013.
- 502 47. Kaiyu Yang, Jacqueline Yau, Li Fei-Fei, Jia Deng, and Olga Russakovsky. A Study of Face Obfuscation in ImageNet. *arXiv*, 2021.
- 503 48. Hyodong Lee, Eshed Margalit, Kamila M Jozwik, Michael A Cohen, Nancy Kanwisher, Daniel L K Yamins, and James J DiCarlo. Topographic deep artificial neural networks reproduce the hallmarks  
504 of the primate inferior temporal cortex face processing network. *bioRxiv*, 2020.
- 505 49. Shan Xu, Yiyuan Zhang, Zonglei Zhen, and Jia Liu. The face module emerges from domain-general visual experience: a deprivation study on deep convolution neural network. *bioRxiv*, 2020.
- 506 50. Le Chang, Bernhard Egger, Thomas Vetter, and Doris Y. Tsao. What computational model provides the best explanation of face representations in the primate brain? *bioRxiv*, 2020.
- 507 51. Zhou Wang and Eero P Simoncelli. Maximum differentiation (mad) competition: A methodology for comparing computational models of perceptual quantities. *Journal of Vision*, 8(12):8–8, 2008.
- 508 52. Kamila Maria Jozwik, Ian Charest, Nikolaus Kriegeskorte, and Radoslaw Martin Cichy. Animacy dimensions ratings and approach for decorrelating stimuli dimensions. *Conference on Cognitive  
509 Computational Neuroscience*, 2017.
- 510 53. Hamed Nili, Cai Wingfield, Alexander Walther, Li Su, William Marslen-Wilson, and Nikolaus Kriegeskorte. A toolbox for representational similarity analysis. *PLoS Computational Biology*, 10(4),  
511 2014. ISBN: 1553-7358 (Electronic)\n1553-734X (Linking).
- 512 54. Katherine R Storrs, Tim C Kietzmann, Alexander Walther, Johannes Mehrer, and Nikolaus Kriegeskorte. Diverse deep neural networks all predict human it well, after training and fitting. *bioRxiv*,  
513 2020.
- 514 55. Katherine R Storrs, Seyed-Mahdi Khaligh-Razavi, and Nikolaus Kriegeskorte. Noise ceiling on the crossvalidated performance of reweighted models of representational dissimilarity: Addendum to  
515 khaligh-razavi & kriegeskorte (2014). *bioRxiv*, 2020.
- 516 56. Tim C Kietzmann, Courtney J Spoerer, Lynn Sørensen, Radoslaw M Cichy, Olaf Hauk, and Nikolaus Kriegeskorte. Recurrence required to capture the dynamic computations of the human ventral  
517 visual stream. *Proceedings of the National Academy of Sciences*, 2019.
- 518 57. Alex Krizhevsky, Ilya Sutskever, and Geoffrey E Hinton. Imagenet classification with deep convolutional neural networks. In *Advances in neural information processing systems*, pages 1097–1105,  
519 2012.
- 520 58. Maximilian Riesenhuber and Tomaso Poggio. Hierarchical models of object recognition in cortex. *Nature neuroscience*, 2(11):1019–1025, 1999.
- 521 59. Aude Oliva and Antonio Torralba. Modeling the shape of the scene: A holistic representation of the spatial envelope. *International journal of computer vision*, 42(3):145–175, 2001.
- 522 60. Gillian Rhodes. Looking at faces: First-order and second-order features as determinants of facial appearance. *Perception*, 17(1):43–63, 1988.
- 523 61. Jessica Taubert, Deborah Apithorp, David Aagten-Murphy, and David Alais. The role of holistic processing in face perception: Evidence from the face inversion effect. *Vision research*, 51(11):  
524 1273–1278, 2011.
